# Supplementary material
Source: MDPI journal article supplement (https://www.mdpi.com/2077-0472/14/3/488)
Supplement: s1 [file s1]

**Figure S1.** The control flowchart of the input system.

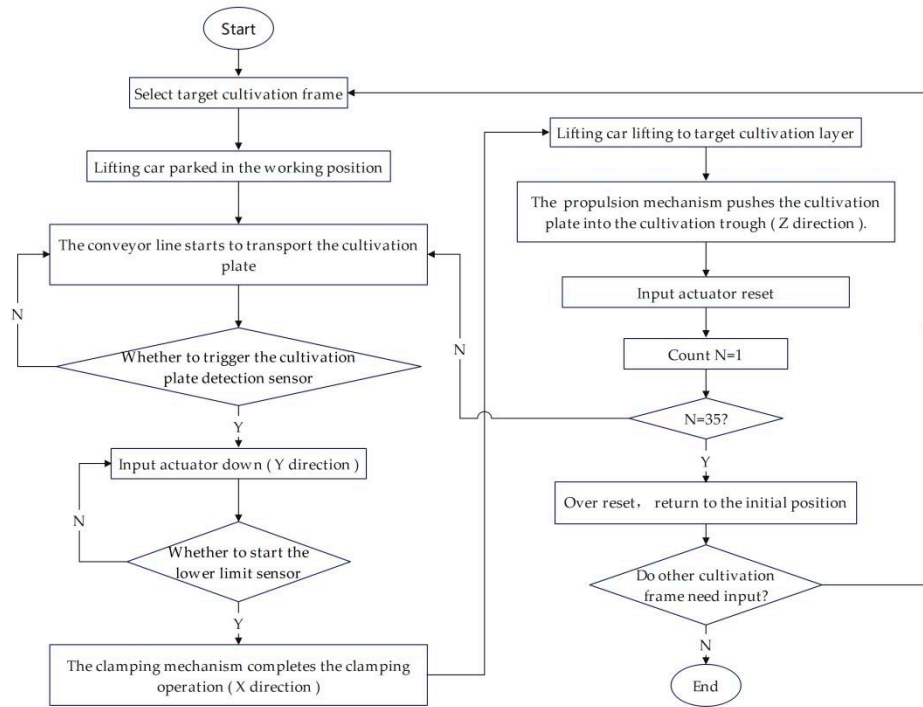

**Figure S2.** The control flowchart of the output system.

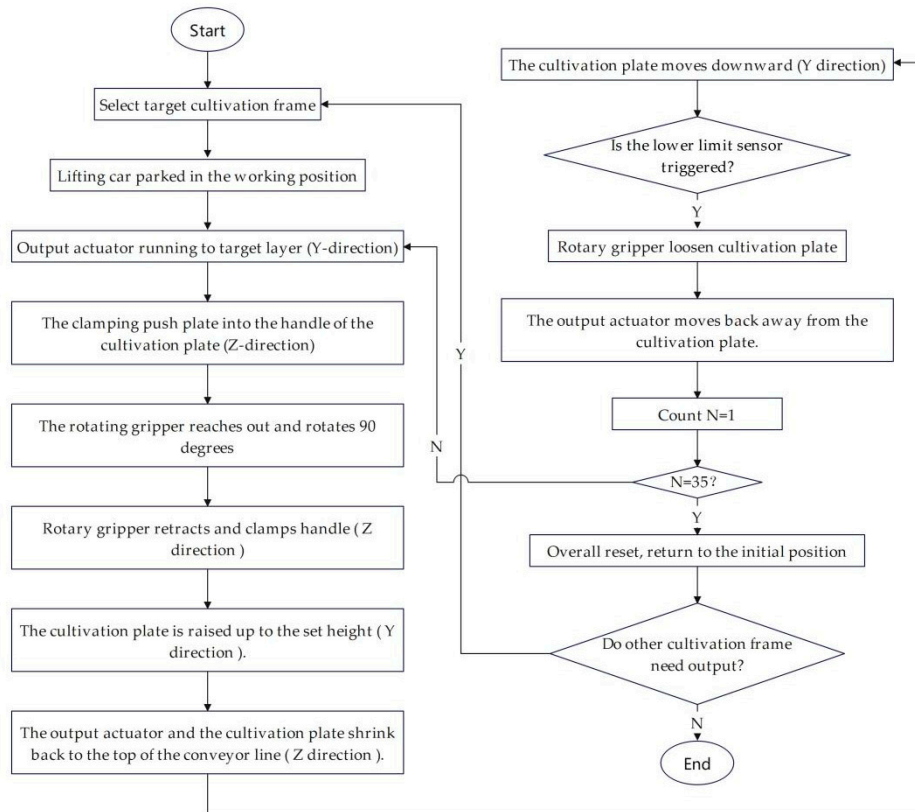

**Figure S3.** The circuit diagram of the input system.

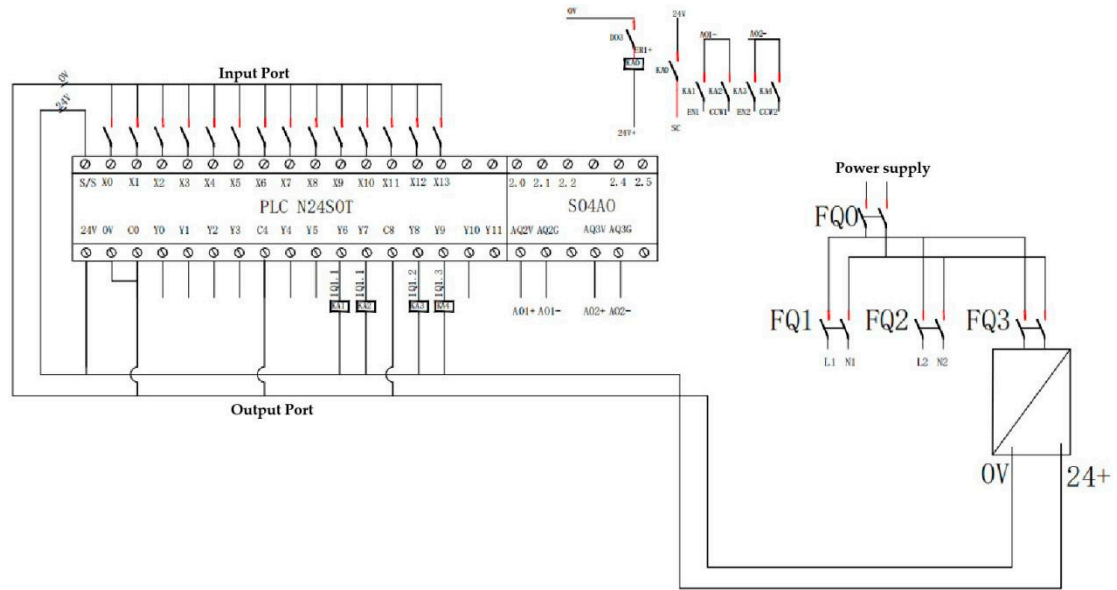

**Figure S4.** The circuit diagram of the output system.

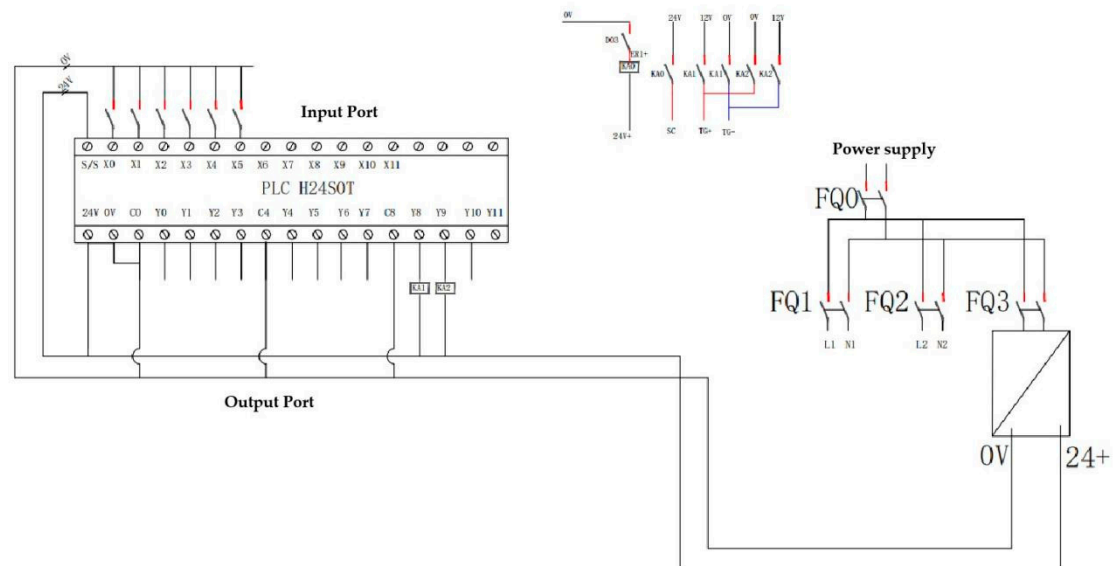

**Table S1.** Electrical component parameter table

| Name                 | Number | Model     | Parameters                                                                                                                          | Manufacturer                                      |
|----------------------|--------|-----------|-------------------------------------------------------------------------------------------------------------------------------------|---------------------------------------------------|
| PLC                  | 2      | N24S0T    | 16 switch inputs, 12 switch outputs, 6 high pulse inputs, 4 sets of analog inputs and outputs, and RS232+RS485 communication ports. | Xiamen Haiwei Technology Co., Ltd., Xiamen, China |
| Private server motor | 2      | SD50-G751 | Rated voltage AC220V, output current 6A.                                                                                            | Xiamen Haiwei Technology Co., Ltd., Xiamen, China |

|                         |    |                  |                                                                                                   |                                                                       |
|-------------------------|----|------------------|---------------------------------------------------------------------------------------------------|-----------------------------------------------------------------------|
| driver                  |    |                  |                                                                                                   |                                                                       |
| Propulsion motor        | 2  | 57BL77S10230 TF9 | Rated voltage DC24V, rated speed 300rpm, rated torque 0.32N. m, power 100w.                       | Beijing Times Chaoqun Electrical Technology Co., Ltd., Beijing, China |
| Propulsion motor driver | 2  | ZM-6506          | The maximum output current is 5A, and the applicable voltage range is DC12-60V.                   | Beijing Times Chaoqun Electrical Technology Co., Ltd., Beijing, China |
| Clamping motor          | 1  | 57HS09           | Step angle 1.8 °, torque 1.2N. m                                                                  | Wenzhou Pufeide Electric Co., Ltd., Wenzhou, China                    |
| Clamping motor driver   | 1  | DM542            | Current 4.2A, applicable voltage range DC9-24V.                                                   | Wenzhou Pufeide Electric Co., Ltd., Wenzhou, China                    |
| Proximity switch        | 14 | I2B1204NO        | Thread diameter M12, PNP normally open, working voltage DC10-30V, maximum detection distance 15mm | Luoshida Sensor (Dongguan) Co., Ltd., Dongguan, China                 |
| linear actuator         | 1  | IP60             | DC12V, stroke 10mm, thrust 40N                                                                    | Zhejiang Haoran Technology Co., Ltd., Leqing, China                   |
